# Supplementary material
Source: Research Square preprint supplement (doi:10.21203/rs.3.rs-9242811/v1)

### Submission Information

|                          |                                                                        |
|--------------------------|------------------------------------------------------------------------|
| Author Name              | Gautam Bhowmik                                                         |
| Title                    | Capability Approach to the Analysis of Disability of Children in India |
| Paper/Submission ID      | 5496827                                                                |
| Submitted by             | utpalkde@gmail.com                                                     |
| Submission Date          | 2026-04-16 08:41:17                                                    |
| Total Pages, Total Words | 24, 9452                                                               |
| Document type            | Research Paper                                                         |

### Result Information

Similarity **8 %**

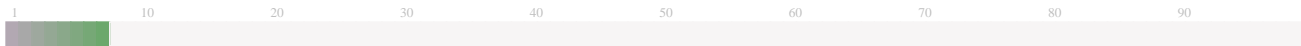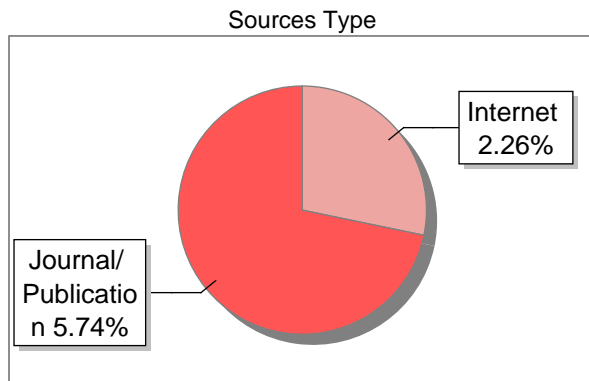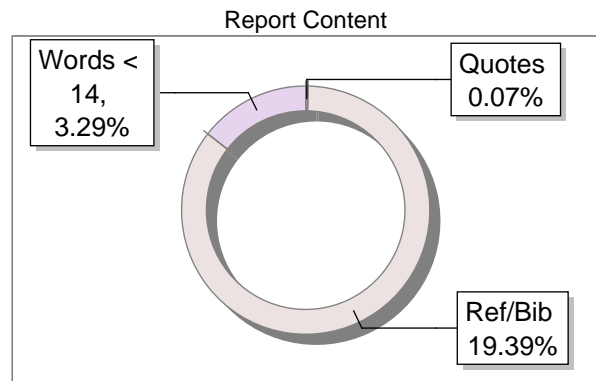

### Exclude Information

|                             |              |
|-----------------------------|--------------|
| Quotes                      | Excluded     |
| References/Bibliography     | Not Excluded |
| Source: Excluded < 14 Words | Not Excluded |
| Excluded Source             | <b>0 %</b>   |
| Excluded Phrases            | Not Excluded |

### Database Selection

|                        |         |
|------------------------|---------|
| Language               | English |
| Student Papers         | Yes     |
| Journals & publishers  | Yes     |
| Internet or Web        | Yes     |
| Institution Repository | Yes     |

A Unique QR Code use to View/Download/Share Pdf File

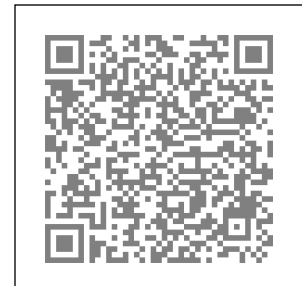

Supplement: Supplementary file 1 [file 021acf9953320eb6927fd99f.pdf]
